# Supplementary material for: Zirconia-Reinforced Lithium Silicate Ceramic in Digital Dentistry: A Comprehensive Literature Review of Our Current Understanding
Source: MDPI journal article supplement (doi:10.3390/medicina59122135), 2023-12-08
Supplement: s1 [file s1]

Table S1 – Articles included based on mechanical parameters assessed.

| Study               | Study Groups                                                                                                                                                      | Sample Size and Thickness                                                                                    | Parameters Assessed                                                                                                                                                                                       | Results                                                                                                                                                                                                                                                                                                                                                                             |
|---------------------|-------------------------------------------------------------------------------------------------------------------------------------------------------------------|--------------------------------------------------------------------------------------------------------------|-----------------------------------------------------------------------------------------------------------------------------------------------------------------------------------------------------------|-------------------------------------------------------------------------------------------------------------------------------------------------------------------------------------------------------------------------------------------------------------------------------------------------------------------------------------------------------------------------------------|
| Ramos et al., 2016  | <ul style="list-style-type: none"> <li>• Vita Mark II (FEL)</li> <li>• Vita Enamic (PIC)</li> <li>• IPS e.max CAD (LD)</li> <li>• Vita Suprinity (ZLS)</li> </ul> | <ul style="list-style-type: none"> <li>• n = 15</li> <li>• 12 mm diameter</li> <li>• 1.2 mm thick</li> </ul> | <ul style="list-style-type: none"> <li>• Elastic modulus</li> <li>• Poisson's ratio</li> <li>• Fracture toughness</li> <li>• Biaxial flexural strength (BFS)</li> </ul>                                   | <ul style="list-style-type: none"> <li>• FEL and PIC, as well as LD and ZLS, showed similar fracture toughness</li> <li>• The zirconia present in the ZLS did not improve the fracture toughness</li> <li>• Weibull modulus of FEL, PIC, LD and ZLS was the same</li> <li>• The FEL showed the lowest susceptibility to slow crack growth, as ZLS and LD had the highest</li> </ul> |
| Elsaka et al., 2016 | <ul style="list-style-type: none"> <li>• Vita Suprinity (VS)</li> <li>• IPS e.max CAD (IC)</li> </ul>                                                             | <ul style="list-style-type: none"> <li>• n = 5</li> <li>• 18 mm × 4 mm × 3 mm</li> </ul>                     | <ul style="list-style-type: none"> <li>• Fracture toughness</li> <li>• Flexural strength</li> <li>• Elastic modulus</li> <li>• Hardness</li> <li>• Brittleness index</li> <li>• Microstructure</li> </ul> | <ul style="list-style-type: none"> <li>• VS showed higher fracture toughness, flexural strength, elastic modulus, and hardness than IC</li> <li>• VS showed higher brittleness than IC</li> <li>• VS had a homogeneous fine crystalline structure</li> <li>• VS showed higher strength compared to IC</li> </ul>                                                                    |

| Study                  | Study Groups                                                                                                                                                                                   | Sample Size and Thickness                                    | Parameters Assessed                                                                                                                  | Results                                                                                                                                                                                                                                                                                                                       |
|------------------------|------------------------------------------------------------------------------------------------------------------------------------------------------------------------------------------------|--------------------------------------------------------------|--------------------------------------------------------------------------------------------------------------------------------------|-------------------------------------------------------------------------------------------------------------------------------------------------------------------------------------------------------------------------------------------------------------------------------------------------------------------------------|
| Vasiliu et al., 2022   | <ul style="list-style-type: none"> <li>• Vita PM9 (FP)</li> <li>• Celtra Press (ZLSP)</li> <li>• Vita Mark II (FM)</li> <li>• Vita Suprinity (ZLSM)</li> </ul>                                 | <p>n=8</p> <p>Crown: 1.5 mm axial and occlusal reduction</p> | <ul style="list-style-type: none"> <li>• Fracture resistance and microhardness (VHN), before and after hydrothermal aging</li> </ul> | <ul style="list-style-type: none"> <li>• ZLD had higher microhardness, and fracture toughness compared to FP and FM</li> <li>• Thermal aging effect the microhardness</li> <li>• ZLSP and ZSLM showed no significant difference</li> <li>• After thermal aging, ZLSM had the greatest microhardness, and FP lowest</li> </ul> |
| Guilar di et al., 2020 | <ul style="list-style-type: none"> <li>• Vitablocs Mark II (FC)</li> <li>• VITA Enamic (PICN)</li> <li>• VITA Suprinity (ZLS)</li> <li>• IPS e.max CAD (LD)</li> <li>• VITA YZ (YZ)</li> </ul> | <p>n = 6</p> <p>15 x 10 x 2 mm</p>                           | <ul style="list-style-type: none"> <li>• Impact strength</li> </ul>                                                                  | <ul style="list-style-type: none"> <li>• FC showed the lowest impact strength, follow by PICN, LD, ZLS</li> <li>• YZ had the highest impact strength</li> </ul>                                                                                                                                                               |
| Attar et al., 2023     | <ul style="list-style-type: none"> <li>• IPS e.max CAD</li> <li>• VITA Suprinity</li> <li>• IPS Empress CAD</li> <li>• Zenostar</li> <li>• CopraSmile</li> </ul>                               | <p>n = 10</p> <p>16 x 4 x 2 mm</p>                           | <ul style="list-style-type: none"> <li>• Flexural strength</li> <li>• Weibull modulus</li> </ul>                                     | <ul style="list-style-type: none"> <li>• Zenostar showed the highest flexural strength, while Empress CAD had the lowest</li> <li>• Suprinity had the highest Weibull modulus, while Empress CAD showed the lowest</li> </ul>                                                                                                 |

| Study                           | Study Groups                                                                                                                                                    | Sample Size and Thickness                                                                                                                                                   | Parameters Assessed                                                                                                                                                               | Results                                                                                                                                                                                                                                                                                                                                                                                                   |
|---------------------------------|-----------------------------------------------------------------------------------------------------------------------------------------------------------------|-----------------------------------------------------------------------------------------------------------------------------------------------------------------------------|-----------------------------------------------------------------------------------------------------------------------------------------------------------------------------------|-----------------------------------------------------------------------------------------------------------------------------------------------------------------------------------------------------------------------------------------------------------------------------------------------------------------------------------------------------------------------------------------------------------|
| Abu-Izze et al., 2018           | <ul style="list-style-type: none"> <li>• Vita Suprinity (ZLS)</li> <li>• Vita Enamic (PIC)</li> </ul>                                                           | n= 15<br><br>0.5 and 1.0 mm                                                                                                                                                 | <ul style="list-style-type: none"> <li>• Fatigue</li> <li>• Failure mode</li> <li>• Stress distribution</li> </ul>                                                                | <ul style="list-style-type: none"> <li>• 0.5 mm ZLS showed lower fatigue strength compared with 1.0 mm PIC</li> <li>• PIC fractures were minor damage, less fragments compared with ZLS fractures</li> <li>• ZLS showed higher concentrations of stresses in the adhesive interface</li> </ul>                                                                                                            |
| Mendoza et al., 2018            | <ul style="list-style-type: none"> <li>• IPS e.max CAD (LD)</li> <li>• VITA Suprinity (ZLS)</li> <li>• VITA Enamic (PICN)</li> <li>• Cerasmart (HPP)</li> </ul> | n = 10<br><br>Crown :<br><ul style="list-style-type: none"> <li>• 1.5 mm axial reduction</li> <li>• 1.0 mm marginal chamfer</li> <li>• 2.0 mm occlusal reduction</li> </ul> | <ul style="list-style-type: none"> <li>• Flexural strength</li> <li>• Flexural modulus</li> <li>• Fracture strength</li> <li>• Microhardness</li> <li>• Microstructure</li> </ul> | <ul style="list-style-type: none"> <li>• LD and ZLS had the highest fracture strength</li> <li>• LD showed the highest flexural strength, then ZLS, HPP, PICN</li> <li>• ZLS had the highest flexural modulus, then LD, PICN, HPP</li> <li>• LD material showed small needle-shaped crystals</li> <li>• ZLS had slightly larger crystals with more elongated, rounded, and rod-like appearance</li> </ul> |
| Campbell de Moraes et al., 2020 | <ul style="list-style-type: none"> <li>• VITA Suprinity (ZLS)</li> <li>• IPS e.max CAD (LD)</li> </ul>                                                          | n=5<br><br><ul style="list-style-type: none"> <li>• 12 mm diameter</li> </ul>                                                                                               | <ul style="list-style-type: none"> <li>• Biaxial flexural strength (BFS)</li> </ul>                                                                                               | <ul style="list-style-type: none"> <li>• LD showed the highest BFS, regardless of the number of firings</li> </ul>                                                                                                                                                                                                                                                                                        |

| Study                   | Study Groups                                                                                                                                                                | Sample Size and Thickness                                        | Parameters Assessed                                                                                                                                                                                                                                                   | Results                                                                                                                                                                                                                                                                                                    |
|-------------------------|-----------------------------------------------------------------------------------------------------------------------------------------------------------------------------|------------------------------------------------------------------|-----------------------------------------------------------------------------------------------------------------------------------------------------------------------------------------------------------------------------------------------------------------------|------------------------------------------------------------------------------------------------------------------------------------------------------------------------------------------------------------------------------------------------------------------------------------------------------------|
|                         |                                                                                                                                                                             | <ul style="list-style-type: none"> <li>• 1.2 mm thick</li> </ul> |                                                                                                                                                                                                                                                                       |                                                                                                                                                                                                                                                                                                            |
| Aurelio et al., 2016    | <ul style="list-style-type: none"> <li>• VITABLOCS Mark II (FEL)</li> <li>• IPS Empress CAD (LEU)</li> <li>• IPS e.max CAD (DIS)</li> <li>• VITA Suprinity (SLZ)</li> </ul> | <p>n=5</p> <p>1.5 ± 0.5 mm</p>                                   | <ul style="list-style-type: none"> <li>• The effect of extended glaze (EG) firing on crack healing and microstructure</li> </ul>                                                                                                                                      | <ul style="list-style-type: none"> <li>• EG showed a more pronounced reduction in defect size, compared to conventional firing</li> <li>• EG generated compressive stress into the material, increasing the fracture toughness</li> <li>• After EG, ZLS crystalline peaks appeared more intense</li> </ul> |
| Schweitzer et al., 2020 | <ul style="list-style-type: none"> <li>• Celtra Duo (ZLS)</li> <li>• IPS e.max CAD (LDS)</li> </ul>                                                                         | <p>n= 30</p> <p>17 x 4 x 1 mm</p>                                | <ul style="list-style-type: none"> <li>• Flexural strength of the specimens subjected to polishing, standard firing and three extended firings: the first (EF1) and second glaze firing (EF2) with controlled overheating of +15 C during the holding time</li> </ul> | <ul style="list-style-type: none"> <li>• Flexural strength showed non-normal distributions for EF1 and EF1+2</li> <li>• Flexural strength for LDS and ZLS showed a significant difference</li> <li>• EF2 increased ZLS flexural strength</li> </ul>                                                        |

| Study                | Study Groups                                                                                                                                      | Sample Size and Thickness                                                                                                                          | Parameters Assessed                                                                                                                                                                       | Results                                                                                                                                                                                                                                                                                                                                                                   |
|----------------------|---------------------------------------------------------------------------------------------------------------------------------------------------|----------------------------------------------------------------------------------------------------------------------------------------------------|-------------------------------------------------------------------------------------------------------------------------------------------------------------------------------------------|---------------------------------------------------------------------------------------------------------------------------------------------------------------------------------------------------------------------------------------------------------------------------------------------------------------------------------------------------------------------------|
| Demirel et al., 2022 | <ul style="list-style-type: none"> <li>• CEREC Tessera (ALDS)</li> <li>• IPS e.max CAD (LDS)</li> <li>• VITA Suprinity (ZLS)</li> </ul>           | <ul style="list-style-type: none"> <li>• n = 10</li> <li>• 12 mm diameter</li> <li>• 1.2 mm thick</li> </ul>                                       | <ul style="list-style-type: none"> <li>• Biaxial flexural strength (BFS), before and after 5000 cycles of coffee thermocycling</li> </ul>                                                 | <ul style="list-style-type: none"> <li>• ZLS showed the highest BFS</li> <li>• LDS had similar BFS values to those of ALDS</li> </ul>                                                                                                                                                                                                                                     |
| Passos et al., 2018  | <ul style="list-style-type: none"> <li>• Vita Mark II</li> <li>• IPS Empress CAD</li> <li>• IPS e.max CAD</li> <li>• Vita Suprinity PC</li> </ul> | <ul style="list-style-type: none"> <li>• n = 10</li> <li>• Molar crown:</li> <li>• 1.5 mm axial and occlusal</li> <li>• 1.0 mm shoulder</li> </ul> | <ul style="list-style-type: none"> <li>• Fracture strength of:</li> <li>• MEOM crowns - Finished without manual enhancement of occlusal morphology</li> <li>• With MEOM crowns</li> </ul> | <ul style="list-style-type: none"> <li>• After MEOM crowns showed a decrease strength to fracture load - 28.4% (Vita Mark II), 41.1% (IPS Empress CAD), 45% (IPS e.max CAD), and 17.7% (Suprinity PC)</li> <li>• Vita Suprinity showed mainly fracture through the crowns</li> </ul>                                                                                      |
| Bergamo et al., 2019 | <ul style="list-style-type: none"> <li>• Vita Suprinity (ZLS)</li> </ul>                                                                          | <ul style="list-style-type: none"> <li>• n = 21</li> <li>• 0.5, 1.0 and 1.5 mm</li> </ul>                                                          | <ul style="list-style-type: none"> <li>• Reliability and failure mode</li> </ul>                                                                                                          | <ul style="list-style-type: none"> <li>• 0.5 mm ZLS had reduction in the reliability of 69% at 200N, 41% at 300 N, 19% at 400 N</li> <li>• 1.0 and 1.5 mm ZLS had reduction in the reliability of 90% at 200N</li> <li>• at 300 and 400N, 1.0 mm (95% and 86%) and 1.5mm crowns (99% and 94%)</li> <li>• The main failure mode was the comprised bulk fracture</li> </ul> |

| Study                | Study Groups                                                                                                                                                                                              | Sample Size and Thickness              | Parameters Assessed                                                                                                                               | Results                                                                                                                                                                                                                                                                                                                |
|----------------------|-----------------------------------------------------------------------------------------------------------------------------------------------------------------------------------------------------------|----------------------------------------|---------------------------------------------------------------------------------------------------------------------------------------------------|------------------------------------------------------------------------------------------------------------------------------------------------------------------------------------------------------------------------------------------------------------------------------------------------------------------------|
| Monteiro et al, 2018 | <ul style="list-style-type: none"> <li>• Vita Suprinity (VS)</li> <li>• Celtra Duo (CD)</li> </ul>                                                                                                        | n = 25<br><br>1.0, 1.5, 2.0 and 2.5 mm | <ul style="list-style-type: none"> <li>• Fatigue failure load</li> </ul>                                                                          | <ul style="list-style-type: none"> <li>• VS and CD showed an increase in mean fatigue failure load with an increase in ceramic thickness</li> <li>• 2.5 mm VS and CD showed the highest fatigue failure load</li> </ul>                                                                                                |
| Piccolo et al., 2022 | <ul style="list-style-type: none"> <li>• Celtra Duo (ZLS)</li> <li>• Vita Blocks Mark II (FE)</li> <li>• Vita Enamic (PICN)</li> <li>• Katana Avencia Block (RK)</li> <li>• Grandio Blocs (RG)</li> </ul> | n = 10<br><br>14 × 14 × 1 mm           | <ul style="list-style-type: none"> <li>• Flexural strength and microhardness of specimens exposed to erosion and/or abrasion</li> </ul>           | <ul style="list-style-type: none"> <li>• FE showed the lowest flexure strength after erosion (E) and erosion and abrasion (E + A) simulations</li> <li>• The acid-erosive exposure decreased microhardness of ZLS, FE, and PICN</li> <li>• ZLS, FE, and PICN showed higher bio-film adhesion than RG and RK</li> </ul> |
| Colombo et al., 2019 | <ul style="list-style-type: none"> <li>• Cerasmart</li> <li>• Lava Ultimate</li> <li>• Gradio Blocs</li> <li>• VITA Suprinity PC</li> </ul>                                                               | n = 15<br><br>2.0 mm                   | <ul style="list-style-type: none"> <li>• Microhardness of specimens, before and after exposure to a carbonated acidic drink, Coca-Cola</li> </ul> | <ul style="list-style-type: none"> <li>• Both, in the control group and after 28 days of exposure to Cola, ZLS showed the highest microhardness</li> <li>• In the control group, hybrid ceramic showed the lowest microhardness</li> <li>• After 21 days of exposure, nano hybrid composite</li> </ul>                 |

| Study | Study Groups | Sample Size and Thickness | Parameters Assessed | Results                            |
|-------|--------------|---------------------------|---------------------|------------------------------------|
|       |              |                           |                     | had the highest microhardness loss |

Table S2 - Articles included based on esthetic parameters assessed

| Study                 | Study Groups                                                                                                                          | Sample Size and Thickness                        | Study Assessment                                                                                                                                                                                                                                             | Results                                                                                                                                                                                                                                |
|-----------------------|---------------------------------------------------------------------------------------------------------------------------------------|--------------------------------------------------|--------------------------------------------------------------------------------------------------------------------------------------------------------------------------------------------------------------------------------------------------------------|----------------------------------------------------------------------------------------------------------------------------------------------------------------------------------------------------------------------------------------|
| Subasi et al., 2018   | <ul style="list-style-type: none"> <li>VITA Suprinity PC (ZLS)</li> <li>IPS e.max CAD (LDS)</li> <li>InCoris TZI C (MonZr)</li> </ul> | <p>n=4</p> <p>0.5, 0.7, 1 mm</p>                 | <ul style="list-style-type: none"> <li>Color difference (<math>\Delta E_{00}</math>) and relative translucency parameter (RTP) were assessed by using a spectroradiometer, before and after, 5,000 coffee thermocycling cycles</li> </ul>                    | <ul style="list-style-type: none"> <li>Coffee thermocycling did not effect the translucency</li> <li>Thickness effected the ZLS color change</li> <li>MonZr had the smallest color change, not perceptible at any thickness</li> </ul> |
| Passos et al.,        | <ul style="list-style-type: none"> <li>Celtra Duo (ZLS) both, HT - High - Translucency LT - Low - Translucency</li> </ul>             | <p>n = 15</p> <p>1.0, 1.5 and 2.0 mm</p>         | <ul style="list-style-type: none"> <li>Color coordinates of each specimen were measured with a spectrophotometer</li> <li>The <math>\Delta E</math> was calculated to determine the color difference between B1 and C2, silver and gold substrate</li> </ul> | <ul style="list-style-type: none"> <li>C2 and silver can be made with 2.0 mm thickness</li> <li>Gold showed clinically acceptable values for 1.5 mm thickness</li> </ul>                                                               |
| Sarikaya et al., 2018 | <ul style="list-style-type: none"> <li>IPS e.max CAD (LDC)</li> <li>VITA Suprinity (ZLS)</li> </ul>                                   | <p>n = 10</p> <p>14 mm diameter 1.2 mm thick</p> | <ul style="list-style-type: none"> <li>Color difference was assessed by using the spectrophotometer, before and after, immersing the specimens in tea, coffee and cola</li> </ul>                                                                            | <ul style="list-style-type: none"> <li><math>\Delta E</math> of ZLS were higher than LDC</li> <li>Coffee was the most colorant beverage</li> </ul>                                                                                     |



| Study                     | Study Groups                                                                                                                                                                                                                   | Sample Size and Thicknesses                                  | Study Assessment                                                                                                                                                                                                                                                       | Results                                                                                                                                                                                                                                                                                                                      |
|---------------------------|--------------------------------------------------------------------------------------------------------------------------------------------------------------------------------------------------------------------------------|--------------------------------------------------------------|------------------------------------------------------------------------------------------------------------------------------------------------------------------------------------------------------------------------------------------------------------------------|------------------------------------------------------------------------------------------------------------------------------------------------------------------------------------------------------------------------------------------------------------------------------------------------------------------------------|
| Aydin et al., 2019        | <ul style="list-style-type: none"> <li>• Cerasmart (hybrid ceramic)</li> <li>• Shofu Block (hybrid ceramic)</li> <li>• Grandio Blocs (composite)</li> <li>• Brilliant Crios (composite)</li> <li>• Celtra Duo (ZLS)</li> </ul> | <p>n=40</p> <p>1.5 X 7 X 12 mm</p>                           | <ul style="list-style-type: none"> <li>• Color difference was measured by using spectrophotometer</li> <li>• The used beverages were wine, coffee, cola, energy drink, distilled water</li> <li>• Samples were stored in an incubator for 30 days, at 37oC</li> </ul>  | <ul style="list-style-type: none"> <li>• Red wine and coffee caused the greatest color change on all tested materials (<math>\Delta E_{00}</math>: 2.25), especially effecting the composite-containing materials</li> <li>• Cola and energy drink effected the least the color (<math>\Delta E_{00}</math>:1.30)</li> </ul> |
| Arif et al., 2018         | <ul style="list-style-type: none"> <li>• Celtra Duo (CD)</li> <li>• IPS e.max CAD (EM)</li> <li>• Lava Ultimate (LU)</li> <li>• VITA Enamic (VE)</li> <li>• VITA Suprinity (VS)</li> <li>• VITA YZ (Zir)</li> </ul>            | <p>n=5</p> <p>Laminate: 0.7 mm</p> <p>Crown: 1.3, 1.5 mm</p> | <ul style="list-style-type: none"> <li>• Color difference and translucency (RTP) were assessed by using spectroradiometer, before and after 6,000 coffee thermocycling cycles</li> </ul>                                                                               | <ul style="list-style-type: none"> <li>• LU presented the greatest color change</li> <li>• EM was the most color stable</li> <li>• Crowns showed lower translucency</li> </ul>                                                                                                                                               |
| Kanat-Erturk et al., 2019 | <ul style="list-style-type: none"> <li>• IPS e.max CAD HT</li> <li>• Vita Suprinity HT</li> </ul>                                                                                                                              | <p>n=10</p> <p>1.5 × 7 × 12 mm</p>                           | <ul style="list-style-type: none"> <li>• Color values were measured with spectrophotometer</li> <li>• Color difference of glaze, mechanical polishing, and external staining and glaze specimens was assessed before and after coffee and black tea storage</li> </ul> | <ul style="list-style-type: none"> <li>• Lithium disilicate showed higher color stability, except for the external staining and glaze specimens storage in coffee</li> <li>• Glazed specimens showed the highest color stability</li> <li>• Polishing paste decreased the color variations</li> </ul>                        |

| Study                | Study Groups                                                                                                                            | Sample Size and Thicknesses                                                                                | Study Assessment                                                                                                                                                                                                                                           | Results                                                                                                                                                                                                                                                                           |
|----------------------|-----------------------------------------------------------------------------------------------------------------------------------------|------------------------------------------------------------------------------------------------------------|------------------------------------------------------------------------------------------------------------------------------------------------------------------------------------------------------------------------------------------------------------|-----------------------------------------------------------------------------------------------------------------------------------------------------------------------------------------------------------------------------------------------------------------------------------|
| Moaleem et al., 2022 | <ul style="list-style-type: none"> <li>• Ceramill Zolid PS</li> <li>• Vitablocs Vita Triluxe Forte</li> <li>• VITA Suprinity</li> </ul> | n=10<br><br>2, 12 and 14 mm                                                                                | <ul style="list-style-type: none"> <li>• Color change was assessed by using the spectrophotometer</li> <li>• The specimens were immersed and stained in smokeless tobacco</li> </ul>                                                                       | <ul style="list-style-type: none"> <li>• Zirconia showed the lowest color change, after one week</li> <li>• Vita Suprinity and Ceramill Zolid showed the highest color change after tobacco exposure at one and two weeks</li> </ul>                                              |
| Alp et al., 2018     | <ul style="list-style-type: none"> <li>• VITA Suprinity PC (ZLS)</li> <li>• IPS e.max CAD (LDS)</li> </ul>                              | n=18<br><br><ul style="list-style-type: none"> <li>• rectangular plates</li> <li>• 1.5 mm thick</li> </ul> | <ul style="list-style-type: none"> <li>• Color differences and relative translucency were assessed by using a noncontact spectroradiometer</li> <li>• The glazed and polished samples were subjected to 5,000 thermocycles in a coffee solution</li> </ul> | <ul style="list-style-type: none"> <li>• Coffee thermocycling effected the color of ZLS and LDS</li> <li>• LDS is more translucent than ZLS, before and after aging</li> <li>• Coffee thermocycling decreased the translucency of both materials</li> </ul>                       |
| Demirel et al., 2022 | <ul style="list-style-type: none"> <li>• CEREC Tessera (ALDS)</li> <li>• IPS e.max CAD (LDS)</li> <li>• VITA Suprinity (ZLS)</li> </ul> | n = 10<br><br><ul style="list-style-type: none"> <li>• 12 mm diameter</li> <li>• 1.2 mm thick</li> </ul>   | <ul style="list-style-type: none"> <li>• Color differences (<math>\Delta E_{00}</math>) and relative translucency parameter (RTP) were assessed by using the digital spectrophotometer, before and after 5,000 cycles of coffee thermocycling</li> </ul>   | <ul style="list-style-type: none"> <li>• All materials had similar color changes</li> <li>• LDS had the highest and ZLS had the lowest RTP values, both before and after thermocycling</li> <li>• Only LDS showed the same translucency before and after thermocycling</li> </ul> |

| Study                | Study Groups                                                                                                                                                                                                              | Sample Size and Thickness                                                                                     | Study Assessment                                                                                                                                                                                                                       | Results                                                                                                                                                                                                                                                                                                                                                                                                                     |
|----------------------|---------------------------------------------------------------------------------------------------------------------------------------------------------------------------------------------------------------------------|---------------------------------------------------------------------------------------------------------------|----------------------------------------------------------------------------------------------------------------------------------------------------------------------------------------------------------------------------------------|-----------------------------------------------------------------------------------------------------------------------------------------------------------------------------------------------------------------------------------------------------------------------------------------------------------------------------------------------------------------------------------------------------------------------------|
| Vasiliu et al., 2020 | <ul style="list-style-type: none"> <li>• Vita PM9 (FP)</li> <li>• IPS e.max Press (LDS)</li> <li>• Celtra Press (ZLS)</li> <li>• Vita Mark II (F)</li> <li>• IPS Emax CAD (LD)</li> <li>• Vita Suprinity (ZLS)</li> </ul> | <ul style="list-style-type: none"> <li>• n=8</li> <li>• rectangular plates</li> <li>• 1.5 mm thick</li> </ul> | <ul style="list-style-type: none"> <li>• Translucency (TP) and opalescence (OP) of polished and glazed samples were assessed by using a spectrophotometer, before and after 10,000 thermocycles in distilled water</li> </ul>          | <ul style="list-style-type: none"> <li>• ZLS and FP were the most effected by the ageing process</li> <li>• Milled and pressed ZLS and LDS showed significant change in opalescence and translucency after ageing</li> <li>• Milled ZLS showed less translucency loss compared to pressed ZLS</li> <li>• Thermocycling process effected the pressed glazed samples, but also the milled polished samples</li> </ul>         |
| Donmez et al., 2022  | <ul style="list-style-type: none"> <li>• Amber Mill (NLD)</li> <li>• IPS e.max CAD (LDS)</li> <li>• Vita Suprinity (ZLS)</li> <li>• BRILLIANT Crios</li> </ul>                                                            | <ul style="list-style-type: none"> <li>• n = 5</li> <li>• 0.7 and 1.5 mm</li> </ul>                           | <ul style="list-style-type: none"> <li>• Color differences (<math>\Delta E_{00}</math>) and relative translucency parameter (RTP) were assessed by using a spectrophotometer, before and after 5,000 thermocycles in coffee</li> </ul> | <ul style="list-style-type: none"> <li>• 0.7 mm ZLS had the lowest <math>\Delta E_{00}</math></li> <li>• 1.5 mm LDS had higher <math>\Delta E</math> than ZLS</li> <li>• NLD had similar <math>\Delta E_{00}</math> values to LDS and ZLS</li> <li>• After thermocycling, RTP of 0.7 mm ZLS were lower than NLD and LDS</li> <li>• LDS and NLD showed similar RTP, regardless of the thickness and aging process</li> </ul> |

| Study               | Study Groups                                                                                                                                                                                                                                                       | Sample Size and Thicknesses                | Study Assessment                                                                                                                                                                                                                                           | Results                                                                                                                                                                                                                                                                                                              |
|---------------------|--------------------------------------------------------------------------------------------------------------------------------------------------------------------------------------------------------------------------------------------------------------------|--------------------------------------------|------------------------------------------------------------------------------------------------------------------------------------------------------------------------------------------------------------------------------------------------------------|----------------------------------------------------------------------------------------------------------------------------------------------------------------------------------------------------------------------------------------------------------------------------------------------------------------------|
| Cakmak et al., 2021 | <ul style="list-style-type: none"> <li>VITA Suprinity (ZLS)</li> </ul>                                                                                                                                                                                             | n=5<br><br>0.8 and 1.5 mm                  | <ul style="list-style-type: none"> <li>Color difference (<math>\Delta E_{00}</math>) and relative translucency parameter (RTP) were assessed by using a noncontact spectroradiometer, before and after, 5,000 coffee thermocycling cycles (CTC)</li> </ul> | <ul style="list-style-type: none"> <li>Translucency was effected by thickness, resin cement shade and coffee thermocycling</li> <li>Translucency decreased after CTC</li> <li>Color difference was effected by material thickness</li> </ul>                                                                         |
| Choi et al., 2020   | <ul style="list-style-type: none"> <li>Tetric CAD (TC)</li> <li>Vitablocs Mark II (VM)</li> <li>IPS Empress CAD (EP)</li> <li>IPS e.max CAD (EM)</li> <li>Celtra Duo (CD)</li> <li>Vita Enamic (VE)</li> <li>Cerasmart (CS)</li> <li>Lava Ultimate (LU)</li> </ul> | n = 15<br><br>14×12×1 mm<br><br>14×12×2 mm | <ul style="list-style-type: none"> <li>Color difference (<math>\Delta E_{00}</math>), translucency parameter (TP), total transmittance (Tt) and contrast ratio (CR) were assessed by using a spectrophotometer, before and after UV aging</li> </ul>       | <ul style="list-style-type: none"> <li>CD showed the lowest translucency and highest opacity</li> <li>TC showed the highest translucency</li> <li>CD showed the highest CR value and TC the lowest</li> <li>Ageing, material type and thickness influenced the optical properties of all tested materials</li> </ul> |

| Study                            | Study Groups                                                                                                                                                        | Sample Size and Thickness                                                                         | Study Assessment                                                                                                                                                                                                                   | Results                                                                                                                                                                                                                                                                                                                                                                                                                           |
|----------------------------------|---------------------------------------------------------------------------------------------------------------------------------------------------------------------|---------------------------------------------------------------------------------------------------|------------------------------------------------------------------------------------------------------------------------------------------------------------------------------------------------------------------------------------|-----------------------------------------------------------------------------------------------------------------------------------------------------------------------------------------------------------------------------------------------------------------------------------------------------------------------------------------------------------------------------------------------------------------------------------|
| Campbelli de Morais et al., 2020 | <ul style="list-style-type: none"> <li>VITA Suprinity (ZLS)</li> <li>IPS e.max CAD (LD)</li> </ul>                                                                  | n=5<br><br><ul style="list-style-type: none"> <li>12 mm diameter</li> <li>1.2 mm thick</li> </ul> | <ul style="list-style-type: none"> <li>Color and translucency variations were determined by using spectrophotometry</li> <li>The specimens were subjected to two firings (2F), five firings (5F) and seven firings (7F)</li> </ul> | <ul style="list-style-type: none"> <li>For ZLS, 2F and 5 F effected the L* and b* values; L* was higher at 5F and 7F</li> <li>ZLS had higher L* than LD</li> <li>LD had higher a* than ZLS, for all the firing types</li> <li><math>\Delta E</math> of LD was significantly lower than ZLS</li> <li>TP had different values for LD and ZLS, at 2F and 5F, but similar values at 7F</li> <li>ZLS showed higher TP at 7F</li> </ul> |
| Nejatid anesh et al., 2019       | <ul style="list-style-type: none"> <li>IPS e.max CAD (LDS)</li> <li>VITA Suprinity PC (ZLS)</li> </ul> both,<br>HT - High - Translucency<br>LT - Low - Translucency | n=10<br><br>0.6, 1 mm                                                                             | <ul style="list-style-type: none"> <li>Translucency and contrast ratio were assessed by using a spectrophotometer</li> <li>The samples were subjected to crystallization, correction, and glaze firing cycles</li> </ul>           | <ul style="list-style-type: none"> <li>At 0.6 mm thickness, the translucency of both, HT-ZLS and LT-LDS, was effected by repeated firings</li> <li>Translucency increased as the thickness of the samples decreased</li> </ul>                                                                                                                                                                                                    |

| Study                   | Study Groups                                                                                                                                                                | Sample Size and Thickness    | Study Assessment                                                                                                                                                                                                                                                                                                                          | Results                                                                                                                                                                                                                                                                                                                                                          |
|-------------------------|-----------------------------------------------------------------------------------------------------------------------------------------------------------------------------|------------------------------|-------------------------------------------------------------------------------------------------------------------------------------------------------------------------------------------------------------------------------------------------------------------------------------------------------------------------------------------|------------------------------------------------------------------------------------------------------------------------------------------------------------------------------------------------------------------------------------------------------------------------------------------------------------------------------------------------------------------|
| Schweitzer et al., 2020 | <ul style="list-style-type: none"> <li>• Celtra Duo (ZLS)</li> <li>• IPS e.max CAD (LDS)</li> </ul>                                                                         | n= 30<br><br>17 x 4 x 1 mm   | <ul style="list-style-type: none"> <li>• Color was measured with a digital spectrophotometer, before and after firing</li> <li>• specimens were subjected to polishing, standard firing and three extended firings: the first (EF1) and second glaze firing (EF2) with controlled overheating of +15 C during the holding time</li> </ul> | <ul style="list-style-type: none"> <li>• The color change after firing of ZLS exceeded the perceptible threshold of <math>\Delta E &gt; 1.5</math> in 23% of EF1 and 10% of EF2 specimens</li> <li>• Between the polished experiments groups, <math>L^*a^*b^*</math> values showed no difference</li> </ul>                                                      |
| Aurelio et al., 2016    | <ul style="list-style-type: none"> <li>• VITABLOCS Mark II (FEL)</li> <li>• IPS Empress CAD (LEU)</li> <li>• IPS e.max CAD (DIS)</li> <li>• VITA Suprinity (SLZ)</li> </ul> | n=5<br><br>1.5 ± 0.5 mm      | <ul style="list-style-type: none"> <li>• Color difference and contrast ratio (CR) were assessed by using a spectrophotometer;</li> <li>• Samples were subjected to conventional (G) firings and extended (EG) glaze firings: dwell time of 15 min, slow cooling rate</li> </ul>                                                           | G and EG firings changed significantly: <ul style="list-style-type: none"> <li>• FEL: <math>L^*</math> (EG) and <math>a^*</math> (G)</li> <li>• LEU: <math>L^*</math>, <math>a^*</math> (EG) and <math>a^*</math> (G)</li> <li>• DIS: <math>L^*</math>, <math>a^*</math>, <math>b^*</math>, CR</li> <li>• ZLS: <math>L^*</math>, <math>a^*</math>, CR</li> </ul> |
| Ozen et al., 2020       | <ul style="list-style-type: none"> <li>• IPS e.max CAD (EC)</li> <li>• VITA Suprinity (VS)</li> <li>• LAVA Ultimate (LU)</li> </ul>                                         | n=24<br><br>14 x 12 x 0.5 mm | <ul style="list-style-type: none"> <li>• Color change was assessed by using a spectrophotometer</li> <li>• Samples were subjected to 5,000 cycles of artificial ageing before the treatment, after polishing, after cement application, and after artificial ageing</li> </ul>                                                            | <ul style="list-style-type: none"> <li>• LU exhibited higher color change than VS and EC, after artificial ageing.</li> <li>• Polishing and glazing determined color change for LU and VS</li> <li>• Color change of glazed VS and EC was below the clinically acceptable level (<math>\Delta E &lt; 3.5</math>)</li> </ul>                                      |

Table S3 - Articles included based on adhesion parameters assessed

| Study              | Study Groups                                                                                                                                      | Surface treatments                                                                                                                                                                                                                                                                                                                                 | Sample Size and Thickness        | Parameters Assessed                                                           | Results                                                                                                                                                                                                                                                                                                                                  |
|--------------------|---------------------------------------------------------------------------------------------------------------------------------------------------|----------------------------------------------------------------------------------------------------------------------------------------------------------------------------------------------------------------------------------------------------------------------------------------------------------------------------------------------------|----------------------------------|-------------------------------------------------------------------------------|------------------------------------------------------------------------------------------------------------------------------------------------------------------------------------------------------------------------------------------------------------------------------------------------------------------------------------------|
| Cinar et al., 2019 | <ul style="list-style-type: none"> <li>• IPS e.max CAD</li> <li>• Vita Suprinity</li> <li>• Lava Ultimate</li> <li>• Vita Enamic</li> </ul>       | <ul style="list-style-type: none"> <li>• Control</li> <li>• Etching (9.5% HF, 20s glass /60s resin)</li> <li>• Etching + silanization (HF + S)</li> <li>• Sandblasting (SB 50µm aluminum oxide, 2 bar, 10 s, 10 mm)</li> <li>• Sandblasting + silanization (SB + S)</li> <li>• Self-adhesive resin cement</li> </ul>                               | <p>n=10</p> <p>2.5 mm slices</p> | <ul style="list-style-type: none"> <li>• Shear bond strength (SBS)</li> </ul> | <ul style="list-style-type: none"> <li>• Vita Enamic showed the highest SBS</li> <li>• Lava Ultimate had the highest SBS when using SB + S</li> <li>• IPS e.max CAD, Vita Suprinity, and Vita Enamic showed the highest SBS, by using HF + S</li> </ul>                                                                                  |
| Altan et al., 2019 | <ul style="list-style-type: none"> <li>• Vita YZ HT</li> <li>• inCoris TZI</li> <li>• IPS e.max ZirCAD</li> <li>• Vita Suprinity (ZLS)</li> </ul> | <ul style="list-style-type: none"> <li>• Control</li> <li>• Etching (9.5% HF, 20s ZLS /60s )</li> <li>• Sandblasting (50 mm Al<sub>2</sub>O<sub>3</sub> , 2 bar, 15s, 10 mm)</li> <li>• Sandblasting + laser irradiation (Er:YAG 2,94 mm, 4W, 10 Hz, 400 mJ, 100 ms)</li> <li>• Laser irradiation</li> <li>• CoJet (15s, 2.8 bar, 10mm)</li> </ul> | <p>n = 10</p> <p>2.5 mm</p>      | <ul style="list-style-type: none"> <li>• Shear bond strength (SBS)</li> </ul> | <ul style="list-style-type: none"> <li>• Vita Suprinity - HF provided the highest SBS, being more effective than CoJet and sandblasting</li> <li>• Vita YZ HT and inCoris TZI showed higher SBS when sandblasting and CoJet, compared to IPS e.max ZirCAD</li> <li>• Laser irradiation did not show clinically acceptable SBS</li> </ul> |

| Study                | Study Groups                                                                                                                                          | Surface treatments                                                                                                                                                                                                                                                                                           | Sample Size and Thickness | Parameters Assessed                                                           | Results                                                                                                                                                                                                                                                                                                                                     |
|----------------------|-------------------------------------------------------------------------------------------------------------------------------------------------------|--------------------------------------------------------------------------------------------------------------------------------------------------------------------------------------------------------------------------------------------------------------------------------------------------------------|---------------------------|-------------------------------------------------------------------------------|---------------------------------------------------------------------------------------------------------------------------------------------------------------------------------------------------------------------------------------------------------------------------------------------------------------------------------------------|
| Maawadh et al., 2021 | <ul style="list-style-type: none"> <li>• Celtra Duo (CD)</li> <li>• Vita Suprinity (ZLS)</li> <li>• IPS e.max CAD</li> </ul>                          | <ul style="list-style-type: none"> <li>• Control: no etching</li> <li>• Etching with 9% hydrofluoric acid (HF) for 10 s, 20 s, 30 s or 60 s</li> <li>• The specimens were exposed to thermocycling for 5,000 cycles</li> </ul>                                                                               | n = 10<br>6 × 1.5 × 6 mm  | <ul style="list-style-type: none"> <li>• Shear bond strength (SBS)</li> </ul> | <ul style="list-style-type: none"> <li>• IPS e.max CAD etched for 20s showed higher SBS compared control, 10s, 30s and 60s groups</li> <li>• CD with firing showed the highest SBS for 30s etching time</li> <li>• CD fired had the lowest SBS in the control group</li> <li>• ZLS showed the highest SBS when etched for 20-30s</li> </ul> |
| Ataol et al., 2018   | <ul style="list-style-type: none"> <li>• IPS e.max CAD (Group A)</li> <li>• IPS e.max ZirCAD (Group B)</li> <li>• Vita Suprinity (Group C)</li> </ul> | 1 ST: HF + silane + bond<br>2 ST: alumina blasting + silane + Bond<br>3 ST: laser +silane + Bond<br>4 ST: HF + Primer<br>5 ST: alumina blasting + Primer<br>6 ST: laser + Primer<br>7 ST: silane + Bond (control)<br>8 ST: Primer (control) Half of the specimens were exposed to 5,000 thermocycling cycles | n = 14<br>12 × 12 × 3 mm  | <ul style="list-style-type: none"> <li>• Shear bond strength (SBS)</li> </ul> | <ul style="list-style-type: none"> <li>• Group A - HF etching showed higher SBS than the other groups; laser etching showed lower SBS than HF etching</li> <li>• Group B - alumina blasting had the highest SBS</li> <li>• Group C - the highest SBS was achieved by HF etching</li> </ul>                                                  |



| Study                | Study Groups                                                                                                                   | Surface treatments                                                                                                                                                                                                                                                                                                                            | Sample Size and Thickness                      | Parameters Assessed                                                         | Results                                                                                                                                                                                                                                                                                                                                                                                        |
|----------------------|--------------------------------------------------------------------------------------------------------------------------------|-----------------------------------------------------------------------------------------------------------------------------------------------------------------------------------------------------------------------------------------------------------------------------------------------------------------------------------------------|------------------------------------------------|-----------------------------------------------------------------------------|------------------------------------------------------------------------------------------------------------------------------------------------------------------------------------------------------------------------------------------------------------------------------------------------------------------------------------------------------------------------------------------------|
| Azevedo et al., 2021 | <ul style="list-style-type: none"> <li>Vitablocs TriLux (FEL)</li> <li>Vita Suprinity PC (ZLS)</li> </ul>                      | <ul style="list-style-type: none"> <li>Etching with 5% hydrofluoric acid (HF) for 20 s, 40 s or 60 s</li> <li>Etching with 10% hydrofluoric acid (HF) for 20 s, 40 s or 60 s</li> <li>The control group was sandblasted with 50 µm aluminum oxide, 20 s, 10 mm, 60 p</li> </ul>                                                               | <p>n = 20</p> <p>10 x 5 x 1 mm<sup>3</sup></p> | <ul style="list-style-type: none"> <li>Shear bond strength (SBS)</li> </ul> | <ul style="list-style-type: none"> <li>ZLS - 10% HF (40 s) is the preferred surface treatment</li> <li>FEL - 5% or 10% HF (20 s) is the best surface treatment</li> </ul>                                                                                                                                                                                                                      |
| Aladag et al., 2023  | <ul style="list-style-type: none"> <li>Upcera ST (Y-TZP)</li> <li>Vita Suprinity (ZLS)</li> <li>Nice block (LD-LAS)</li> </ul> | <ul style="list-style-type: none"> <li>Control</li> <li>Er:YAG (2940nm, 2W, 200mJ, 10Hz/s, 75µs)</li> <li>Nd:YAG (1064nm, 2W, 100mJ, 20Hz/s, 150µs)</li> <li>Etching with hydrofluoric acid (5% HFA, 20s)</li> <li>Er:YAG + HFA</li> <li>Nd:YAG + HFA</li> <li>Sandblasting (50 mm Al<sub>2</sub>O<sub>3</sub>, 2 bar, 15s, 10 mm)</li> </ul> | <p>n = 7</p> <p>2.5 mm</p>                     | <ul style="list-style-type: none"> <li>Shear bond strength (SBS)</li> </ul> | <ul style="list-style-type: none"> <li>Y-TZP - Er:YAG and Nd:YAG showed the highest SBS, as HFA had the lowest SBS</li> <li>ZLS - HFA, HFA + Er:YAG, and HFA + Nd:YAG showed significantly higher SBS compared to the control group</li> <li>ZLS - HFA + Er:YAG had the highest SBS; as the Er:YAG showed the lowest SBS.</li> <li>LD-LAS - HFA, HFA + Er:YAG, and HFA + Nd:YAG SBS</li> </ul> |

| Study                  | Study Groups                                                                                                                                                                                                                                                                   | Surface treatments                                                                                                                                                                                                                                                                                                                                                    | Sample Size and Thickness      | Parameters Assessed                                                   | Results                                                                                                                                                                                                                                |
|------------------------|--------------------------------------------------------------------------------------------------------------------------------------------------------------------------------------------------------------------------------------------------------------------------------|-----------------------------------------------------------------------------------------------------------------------------------------------------------------------------------------------------------------------------------------------------------------------------------------------------------------------------------------------------------------------|--------------------------------|-----------------------------------------------------------------------|----------------------------------------------------------------------------------------------------------------------------------------------------------------------------------------------------------------------------------------|
|                        |                                                                                                                                                                                                                                                                                |                                                                                                                                                                                                                                                                                                                                                                       |                                |                                                                       | were higher than control group                                                                                                                                                                                                         |
| Weyhrauch et al., 2016 | <ul style="list-style-type: none"> <li>• Vita Mark II (FSC)</li> <li>• IPS Empress CAD (LrGC)</li> <li>• IPS e.max CAD (LiDS)</li> <li>• Vita Suprinity (PSZirLS)</li> <li>• Vita Enamic (PolyFSP)</li> <li>• Lava Ultimate (ResNC)</li> <li>• Celtra Duo (FcZirLS)</li> </ul> | <ul style="list-style-type: none"> <li>• The implant abutments exterior surfaces were airborne-particle abraded - 50 µm, 10 mm, 1 bar, 60 s and silanized</li> <li>• The crowns were etched with hydrofluoric acid or sandblasted and silanized</li> <li>• The adhesion surface of the abutment and inner crown surfaces were also conditioned with silane</li> </ul> | n = 10<br><br>14 mm block size | <ul style="list-style-type: none"> <li>• Fracture strength</li> </ul> | <ul style="list-style-type: none"> <li>• LiDS, PSZirLS, PolyFSP and ResNC showed significantly higher fracture strength compared with FSP, FcZirLS, and LrGC</li> <li>• PSZirLS showed the most increased fracture strength</li> </ul> |

| Study               | Study Groups                                                                                                                                         | Surface treatments                                                                                                                                                                                                                                                                                                                                                                                                                                              | Sample Size and Thickness           | Parameters Assessed                                                         | Results                                                                                                                                                                                                                                                                               |
|---------------------|------------------------------------------------------------------------------------------------------------------------------------------------------|-----------------------------------------------------------------------------------------------------------------------------------------------------------------------------------------------------------------------------------------------------------------------------------------------------------------------------------------------------------------------------------------------------------------------------------------------------------------|-------------------------------------|-----------------------------------------------------------------------------|---------------------------------------------------------------------------------------------------------------------------------------------------------------------------------------------------------------------------------------------------------------------------------------|
|                     |                                                                                                                                                      | <ul style="list-style-type: none"> <li>The specimens were exposed to 5,000 thermal cycles</li> </ul>                                                                                                                                                                                                                                                                                                                                                            |                                     |                                                                             |                                                                                                                                                                                                                                                                                       |
| Sevmez et al., 2021 | <ul style="list-style-type: none"> <li>Celtra Duo (CD)</li> <li>Vita Suprinity (VS)</li> <li>Vita Enamic (VE)</li> <li>Nacera Hybrid (NH)</li> </ul> | <ul style="list-style-type: none"> <li>K: Control</li> <li>H: 5% HF acid, 20s</li> <li>HS: 5% HF acid, 20s + silane 60s</li> <li>A: Air-abrasion, 50-micron Al<sub>2</sub>O<sub>3</sub>, 2.5 bar</li> <li>AS: Air-abrasion, 50-micron Al<sub>2</sub>O<sub>3</sub>, 2.5 b pressure + silane 60s</li> <li>C: Air-abrasion 30-micron silica-coated alumina 2.5 bar</li> <li>CS: Air-abrasion with 30-micron silica-coated alumina 2.5 bar + silane 60 s</li> </ul> | <p>n = 10</p> <p>10 x 10 x 1 mm</p> | <ul style="list-style-type: none"> <li>Shear bond strength (SBS)</li> </ul> | <ul style="list-style-type: none"> <li>CD, VS and NH showed the highest SBS for H and HS groups</li> <li>VE had the highest SBS for CS group</li> <li>C and CS groups had the highest SBS for VE, and A and AS for VE and VS</li> <li>CD showed the lowest SBS for K group</li> </ul> |

| Study                        | Study Groups                                                                                                                                                                        | Surface treatments                                                                                                                                                                                                        | Sample Size and Thickness  | Parameters Assessed                                                           | Results                                                                                                                                                                                                                                                                        |
|------------------------------|-------------------------------------------------------------------------------------------------------------------------------------------------------------------------------------|---------------------------------------------------------------------------------------------------------------------------------------------------------------------------------------------------------------------------|----------------------------|-------------------------------------------------------------------------------|--------------------------------------------------------------------------------------------------------------------------------------------------------------------------------------------------------------------------------------------------------------------------------|
|                              |                                                                                                                                                                                     | <ul style="list-style-type: none"> <li>• S: Silane 60 s</li> </ul>                                                                                                                                                        |                            |                                                                               |                                                                                                                                                                                                                                                                                |
| Secilmi<br>s et al.,<br>2016 | <ul style="list-style-type: none"> <li>• IPS <a href="#">e.max</a> CAD (LDG)</li> <li>• Vita Suprinity (ZLDC)</li> <li>• Lava Ultimate (RNC)</li> <li>• Vita Enamic (HC)</li> </ul> | <ul style="list-style-type: none"> <li>• RNC - 50µm aluminum oxide, 2 bar, 10 s, 10 mm)</li> <li>• LDG and ZLDC - 9% HF, 20 s</li> <li>• HC - HF, 60 s</li> <li>• Multilink N (M)</li> <li>• Panavia F 2.0 (P)</li> </ul> | n = 12<br><br>2.0 mm blocs | <ul style="list-style-type: none"> <li>• Shear bond strength (SBS)</li> </ul> | <ul style="list-style-type: none"> <li>• RNC-P showed the highest SBS</li> <li>• LDG-M and ZLDC-M showed the highest bond strength</li> <li>• ZLDC-P, HC-P, and LDG-P showed no significant differences</li> <li>• RNC-M and HC-M showed no significant differences</li> </ul> |

| Study               | Study Groups                                                                                                                          | Surface treatments                                                                                                                                                                                                                                                                             | Sample Size and Thickness   | Parameters Assessed                                                                                      | Results                                                                                                                                                                                                                                                                                                                        |
|---------------------|---------------------------------------------------------------------------------------------------------------------------------------|------------------------------------------------------------------------------------------------------------------------------------------------------------------------------------------------------------------------------------------------------------------------------------------------|-----------------------------|----------------------------------------------------------------------------------------------------------|--------------------------------------------------------------------------------------------------------------------------------------------------------------------------------------------------------------------------------------------------------------------------------------------------------------------------------|
| Traini et al., 2016 | <ul style="list-style-type: none"> <li>Vita Suprinity (ZLS)</li> </ul>                                                                | <ul style="list-style-type: none"> <li>The crystallization was done at 840°C for 8 min in a ceramic furnace</li> <li>Etching with 4,9% hydrofluoric acid (HF) for 20 s and 40 s</li> <li>Etching with 9,5% hydrofluoric acid (HF) for 20 s and 40 s</li> </ul>                                 | n = 8<br><br>3.5×3.0×1.0 mm | <ul style="list-style-type: none"> <li>Vickers hardness (Hv)</li> <li>Fracture toughness (Ft)</li> </ul> | <ul style="list-style-type: none"> <li>Ft and HV values significantly increase after crystallization treatment of ZLS</li> <li>Etching with 4,9%HF for 20 s provided the best surface treatment</li> </ul>                                                                                                                     |
| Donmez et al., 2020 | <ul style="list-style-type: none"> <li>Vita Enamic</li> <li>IPS Empress CAD</li> <li>IPS e.max CAD</li> <li>Vita Suprinity</li> </ul> | <ul style="list-style-type: none"> <li>Control</li> <li>Etching with MEP for 60 s</li> <li>Etching with MEP for 120 s</li> <li>Etching with 5% HF for 60s and 120s</li> <li>Etching with 9.5% HF for 60s and 120s</li> <li>The specimens were exposed to 5,000 thermocycling cycles</li> </ul> | n = 10                      | <ul style="list-style-type: none"> <li>Shear bond strength (SBS)</li> </ul>                              | <ul style="list-style-type: none"> <li>Hybrid ceramic showed a lower SBS than lithium disilicate glass-ceramic</li> <li>9.5% HF showed higher SBS, regardless the exposure time</li> <li>Zirconia-reinforced lithium silicate showed no difference between the specimens treated with MEP60, HF-5%60s and HF-5%120s</li> </ul> |

| Study                             | Study Groups                                                                                       | Surface treatments                                                                                                                                                                                                                                                                                                                                             | Sample Size and Thickness            | Parameters Assessed                                                                                  | Results                                                                                                                                                                                                                                                                                                                                           |
|-----------------------------------|----------------------------------------------------------------------------------------------------|----------------------------------------------------------------------------------------------------------------------------------------------------------------------------------------------------------------------------------------------------------------------------------------------------------------------------------------------------------------|--------------------------------------|------------------------------------------------------------------------------------------------------|---------------------------------------------------------------------------------------------------------------------------------------------------------------------------------------------------------------------------------------------------------------------------------------------------------------------------------------------------|
| Al-<br>Thagafi<br>et al.,<br>2016 | <ul style="list-style-type: none"> <li>• IPS e.max CAD</li> <li>• Vita Suprinity</li> </ul>        | <ul style="list-style-type: none"> <li>• Group C: control</li> <li>• Group HF: 5%HF, 60s</li> <li>• Group HF+H: 5%HF,60s and Heliobond</li> <li>• Group CO: CoJet (tribochemical silica coating) 10 mm, 2.8 bar, 15s + Silane</li> <li>• the specimens were thermocycled for 5,000 cycles</li> </ul>                                                           | 4 x 6 x 3 mm                         | <ul style="list-style-type: none"> <li>• Microtensile Bond Strength (<math>\mu</math>TBS)</li> </ul> | <ul style="list-style-type: none"> <li>• IPS e.max CAD - group CO showed the highest and HF the lowest <math>\mu</math>TBS.</li> <li>• Vita Suprinity - group CO exhibit the highest <math>\mu</math>TBS, and the lowest in HF and HF-H groups</li> </ul>                                                                                         |
| Pucci et al., 2022                | <ul style="list-style-type: none"> <li>• Vita Enamic (PICN)</li> <li>• Celtra Duo (ZLS)</li> </ul> | <p>Group 1: 5% HF + silanisation (SI)</p> <p>Group 2: air-abrasion (AB) with 50 <math>\mu</math>m Al<sub>2</sub>O<sub>3</sub> + 5% HF + SI</p> <p>Group 3: 5% HF + universal adhesive (UA)</p> <p>Group 4: air-abrasion (AB) with 50 <math>\mu</math>m Al<sub>2</sub>O<sub>3</sub> + 5% HF + SI + UA</p> <p>* HF- etching time - 30 s (ZLS) or 60 s (PICN)</p> | <p>n = 10</p> <p>10 x 5 x 1.5 mm</p> | <ul style="list-style-type: none"> <li>• Shear bond strength (SBS)</li> </ul>                        | <ul style="list-style-type: none"> <li>• PICN treated with HF+UA presented the lowest SBS reduction and no differences at one year evaluation</li> <li>• PICN and ZLS showed no differences at 24h, regardless the surface treatment</li> <li>• PICN treated with HF+UA and ZLS treated with AB+HF+SI+UA showed higher SBS at one year</li> </ul> |

| Study               | Study Groups                                                                                                                        | Surface treatments                                                                                                                                                                                                                                                                                   | Sample Size and Thickness                                                                                                                | Parameters Assessed                                                                                    | Results                                                                                                                                                                                                                                                                                                                         |
|---------------------|-------------------------------------------------------------------------------------------------------------------------------------|------------------------------------------------------------------------------------------------------------------------------------------------------------------------------------------------------------------------------------------------------------------------------------------------------|------------------------------------------------------------------------------------------------------------------------------------------|--------------------------------------------------------------------------------------------------------|---------------------------------------------------------------------------------------------------------------------------------------------------------------------------------------------------------------------------------------------------------------------------------------------------------------------------------|
| Okutan et al., 2022 | <ul style="list-style-type: none"> <li>• IPS Empress CAD (EC)</li> <li>• Vita Suprinity (VS)</li> <li>• Vita Enamic (VE)</li> </ul> | <ul style="list-style-type: none"> <li>• Single-step self-etching system Monobond Etch &amp; Prime (MEP) for 60 s</li> </ul>                                                                                                                                                                         | n = 10<br><br>1.0, 2.0 and 3.0 mm                                                                                                        | <ul style="list-style-type: none"> <li>• Shear bond strength (SBS)</li> </ul>                          | <ul style="list-style-type: none"> <li>• VS and VE had significantly lower SBS values than EC</li> <li>• 2 mm EC and VS had higher SBS values than their 3 mm groups</li> <li>• 2 mm and 3 mm specimens had significantly lower SBS values than 1 mm-thick</li> </ul>                                                           |
| Preis et al., 2015  | <ul style="list-style-type: none"> <li>• Celtra Duo (ZLS)</li> <li>• IPS e.max CAD (LDS)</li> </ul>                                 | <ul style="list-style-type: none"> <li>• Etching with 5% hydrofluoric acid (HF) for 20 s LDS and 30 s ZLS</li> <li>• Glass-ionomer cements (GIC)</li> <li>• Resin and resin-modified self-adhesive cements</li> <li>• TCML: 3000×5°C/3000×55°C; <math>1.2 \times 10^6</math> cycles, 50 N</li> </ul> | n = 8<br><br>Crown: <ul style="list-style-type: none"> <li>• 1.5 mm circular and occlusal</li> <li>• 1.0 mm circular shoulder</li> </ul> | <ul style="list-style-type: none"> <li>• Fracture resistance</li> <li>• Marginal adaptation</li> </ul> | <ul style="list-style-type: none"> <li>• No significant differences were found between the cementation methods</li> <li>• Marginal quality adaptation was found before and after TCML for ZLS and LDS</li> <li>• Adhesive bonded ZLS showed a high fracture resistance, but their marginal quality decreased by TCML</li> </ul> |

| Study                | Study Groups                                                                                | Surface treatments                                                                                                                                                                                                                                                                                                          | Sample Size and Thickness                                                                                                          | Parameters Assessed                                                                | Results                                                                                                                                                                                                                     |
|----------------------|---------------------------------------------------------------------------------------------|-----------------------------------------------------------------------------------------------------------------------------------------------------------------------------------------------------------------------------------------------------------------------------------------------------------------------------|------------------------------------------------------------------------------------------------------------------------------------|------------------------------------------------------------------------------------|-----------------------------------------------------------------------------------------------------------------------------------------------------------------------------------------------------------------------------|
| Falachi et al., 2020 | <ul style="list-style-type: none"> <li>Vita Suprinity (ZLS)</li> </ul>                      | <ul style="list-style-type: none"> <li>Etching with 5% hydrofluoric acid for 20 s</li> <li>Dual-cure resin cement (Panavia F2.0)</li> <li>50-µm cement space</li> </ul>                                                                                                                                                     | <p>n = 10</p> <p>Overlay preparation on:<br/>O, OS, OG and OSG</p>                                                                 | <ul style="list-style-type: none"> <li>Marginal adaptation</li> </ul>              | <ul style="list-style-type: none"> <li>group O showed significantly higher marginal adaptation than the group OSG</li> <li>No significant difference was noted in marginal adaptation of groups O, OS, and OG</li> </ul>    |
| Amini et al., 2021   | <ul style="list-style-type: none"> <li>Celtra Duo (ZLS)</li> <li>DD Bio ZX2 (Zr)</li> </ul> | <ul style="list-style-type: none"> <li>ZLS - hydrofluoric acid and silane</li> <li>Zr - sandblasting with 50 µm Al<sub>2</sub>O<sub>3</sub></li> <li>Panavia F2.0 cement</li> <li>The specimens were exposed to 5000 thermomechanical cycles</li> <li>Cement space - 0 for the margins and 50 µm for other areas</li> </ul> | <p>n = 14</p> <p>-2 mm occlusal<br/>-3-5 mm pulp chamber deep<br/>-6 degree divergence of the walls<br/>-90 degree butt margin</p> | <ul style="list-style-type: none"> <li>Marginal and internal adaptation</li> </ul> | <ul style="list-style-type: none"> <li>ZLS showed significantly higher internal adaptation compared to the Zr</li> <li>For ZLS and Zr, cementation process and thermomechanical aging increased the marginal gap</li> </ul> |



| Study                | Study Groups                                                                                                                                           | Surface treatments                                                                                                                                                                  | Sample Size and Thickness                                                                                                                                                                     | Parameters Assessed                                                                                | Results                                                                                                                                                                                                                                                                                                                                                                         |
|----------------------|--------------------------------------------------------------------------------------------------------------------------------------------------------|-------------------------------------------------------------------------------------------------------------------------------------------------------------------------------------|-----------------------------------------------------------------------------------------------------------------------------------------------------------------------------------------------|----------------------------------------------------------------------------------------------------|---------------------------------------------------------------------------------------------------------------------------------------------------------------------------------------------------------------------------------------------------------------------------------------------------------------------------------------------------------------------------------|
| Vasiliu et al., 2020 | <ul style="list-style-type: none"> <li>Vita Suprinity (ZLSM)</li> <li>Vita Mark II (FM)</li> <li>Vita PM9 (FP)</li> <li>Centra Press (ZLSP)</li> </ul> | <ul style="list-style-type: none"> <li>Self-etch self-adhesive resin cement (Maxcem Elite, Self Etch, Kerr)</li> <li>The specimens were exposed to 10,000 thermal cycles</li> </ul> | <ul style="list-style-type: none"> <li>n = 8</li> <li>-1.5 -2 mm occlusal</li> <li>-1 mm rounded chamfer</li> <li>-6 degree divergence of the walls</li> <li>-lingual cusp beveled</li> </ul> | <ul style="list-style-type: none"> <li>Marginal and internal adaptation</li> </ul>                 | <ul style="list-style-type: none"> <li>ZLSP and ZLSM showed significant differences in the axial and occlusal areas</li> <li>FM showed the best marginal and internal fit</li> <li>After cementation and aging, FM showed decreased marginal fit compared to ZLS ceramics</li> <li>As, differences in the axial and occlusal areas were found between ZLSMP and ZLSP</li> </ul> |
| Taha et al., 2018    | <ul style="list-style-type: none"> <li>IPS e.max CAD (EX)</li> <li>Vita Enamic (VE)</li> <li>Celtra Duo (CD)</li> <li>Cerasmart (CS)</li> </ul>        |                                                                                                                                                                                     | <ul style="list-style-type: none"> <li>n = 10</li> <li>Endocrown: - 90 butt margin design</li> <li>- 2 mm occlusal</li> <li>- 6 mm extending into the pulp chamber</li> </ul>                 | <ul style="list-style-type: none"> <li>Fracture resistance</li> <li>Marginal adaptation</li> </ul> | <ul style="list-style-type: none"> <li>CS showed the highest mean fracture load with statistically significant difference than VE and CD</li> <li>CS and EX showed statistically insignificant differences</li> <li>Cementation and thermomechanic</li> </ul>                                                                                                                   |

| Study               | Study Groups                                                              | Surface treatments                                                                                                                                           | Sample Size and Thickness                                                                    | Parameters Assessed          | Results                                                                                                                                            |
|---------------------|---------------------------------------------------------------------------|--------------------------------------------------------------------------------------------------------------------------------------------------------------|----------------------------------------------------------------------------------------------|------------------------------|----------------------------------------------------------------------------------------------------------------------------------------------------|
|                     |                                                                           |                                                                                                                                                              | - 8 degree divergence of the walls.                                                          |                              | al aging increased statistically significant the marginal gap, for all the materials                                                               |
| Alves et al., 2020  | IPS e.max CAD (LD)<br>Vita Suprinity (ZLS)<br>Prettau Anterior (Trans YZ) | LD and ZLS - 5% Hydrofluoric acid applied for 20s and silane<br>Trans YZ - Airborne-particle abrasion with 45 µm aluminum oxide particles, 15 s and silane   | n = 15<br><br>Crown design: flat occlusal surface 1.5 mm for all regions                     | Fatigue                      | Trans YZ material showed the highest fatigue performance, and survival rate followed by ZLS and LD<br>ZLS showed superior fatigue resistance to LD |
| Sahebi et al., 2022 | Celtra Duo (ZLS)<br>DD BIO ZX2 (ZR)                                       | Zr - air-abrasion with 50 µm alumina particles<br>ZLS - 9% hydrofluoric acid (HF), 30 s + silane<br>Specimens were subjected to 5000 thermomechanical cycles | n = 14<br><br>-2 mm occlusal<br>-4 mm pulp chamber deep<br>-6 degree divergence of the walls | Fracture load Retention test | ZR endocrowns showed higher fracture loads than ZLS endocrowns<br>ZLS had higher retention compared to ZR endocrowns                               |

| Study | Study Groups | Surface treatments | Sample Size and Thickness | Parameters Assessed | Results |
|-------|--------------|--------------------|---------------------------|---------------------|---------|
|       |              |                    | -90 degree butt margin    |                     |         |
